# Supplementary material for: Investigation into defect chemistry and relaxation processes in niobium doped and undoped SrBi4Ti4O15using impedance spectroscopy
Source: Royal Society of Chemistry journal article supplement (doi:10.1039/c8ra06621c), 2018-01-01
Supplement: c8ra06621c1.pdf [file c8ra06621c1.pdf]

## Electronic Supplementary information

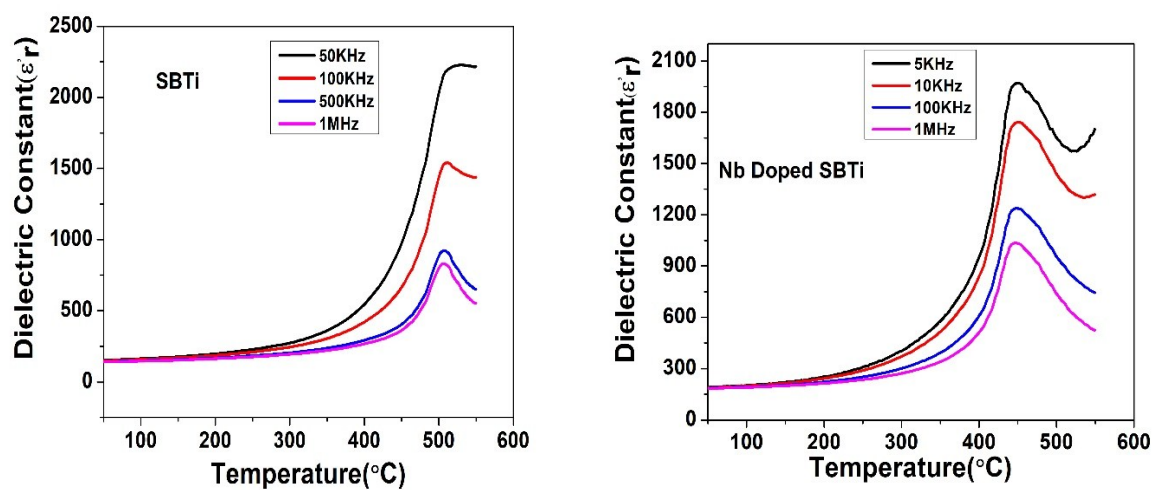

Figure: Dielectric constant versus temperature at different frequencies.

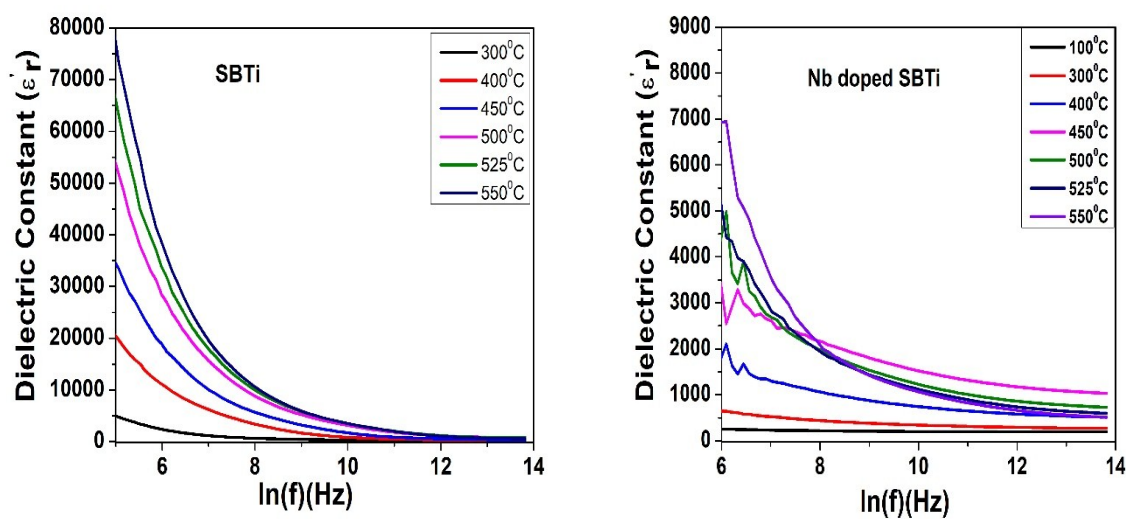

Figure: Frequency response of dielectric constant at different temperatures.

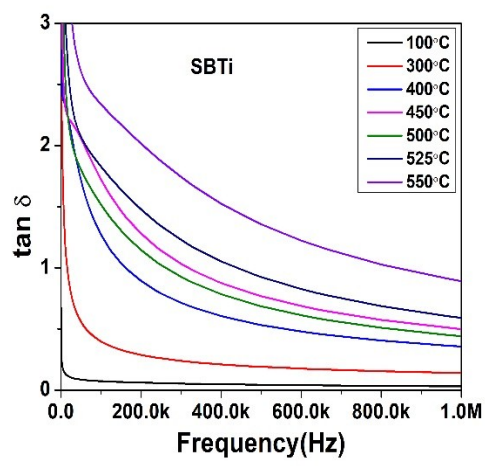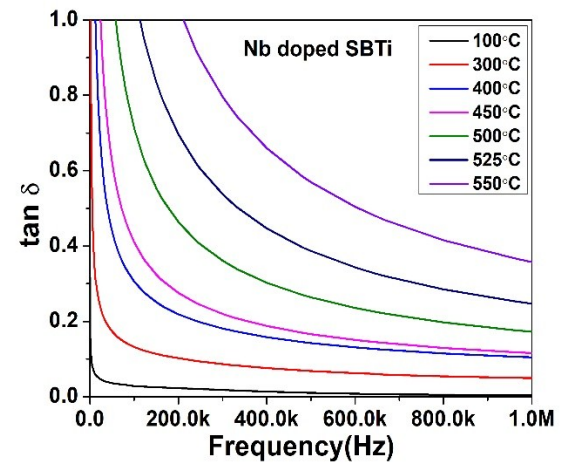

Figure: Frequency response of dielectric loss ( $\tan \delta$ ) at different temperatures.
